# Supplementary material for: Comparative Effect of UV, UV/H2O2 and UV/H2O2/Fe on Terbuthylazine Degradation in Natural and Ultrapure Water
Source: MDPI journal article supplement (doi:10.3390/molecules27144507), 2022-07-14
Supplement: s1 [file s1]

Supplementary Materials

# Comparative Effect of UV, UV/H<sub>2</sub>O<sub>2</sub> and UV/H<sub>2</sub>O<sub>2</sub>/Fe on Terbuthylazine Degradation in Natural and Ultrapure Water

José Antonio Andrades, Manuel Lojo-López, Agata Egea-Corbacho \* and José María Quiroga

Department of Environmental Technologies, Faculty of Marine and Environmental Sciences, University of Cadiz, Puerto Real, 11510 Cadiz, Spain; antonio.andrade@uca.es (J.A.A.); manuel.lojo@uca.es (M.L.-L.); josemaria.quiroga@uca.es (J.M.Q.)

\* Correspondence: agata.egea@uca.es; Tel.: +34-956-016-000

(a)

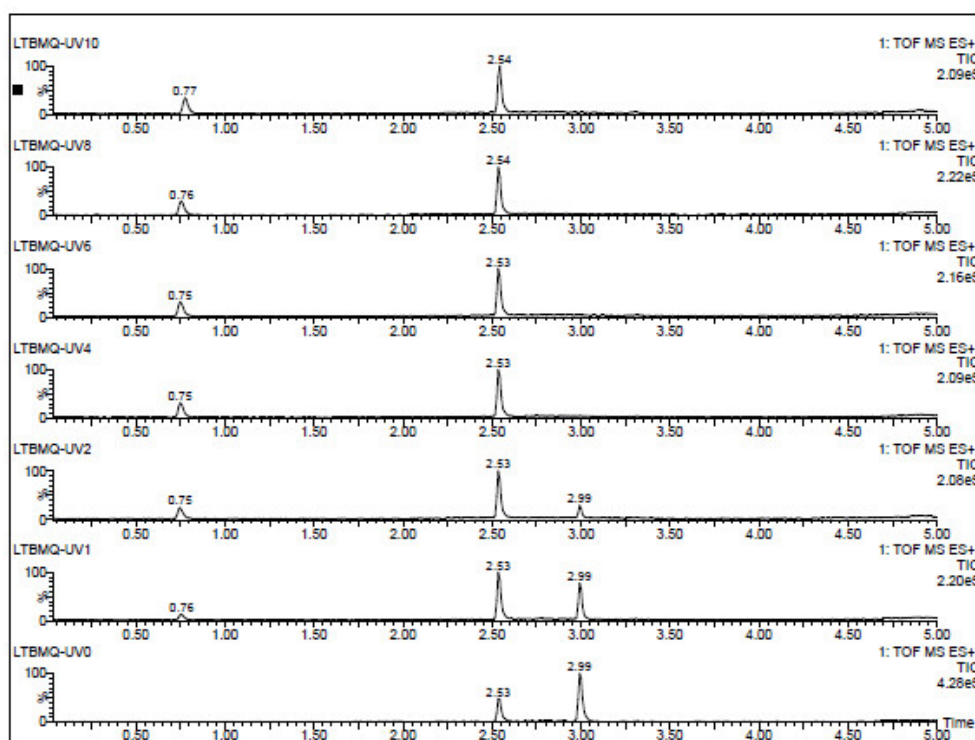

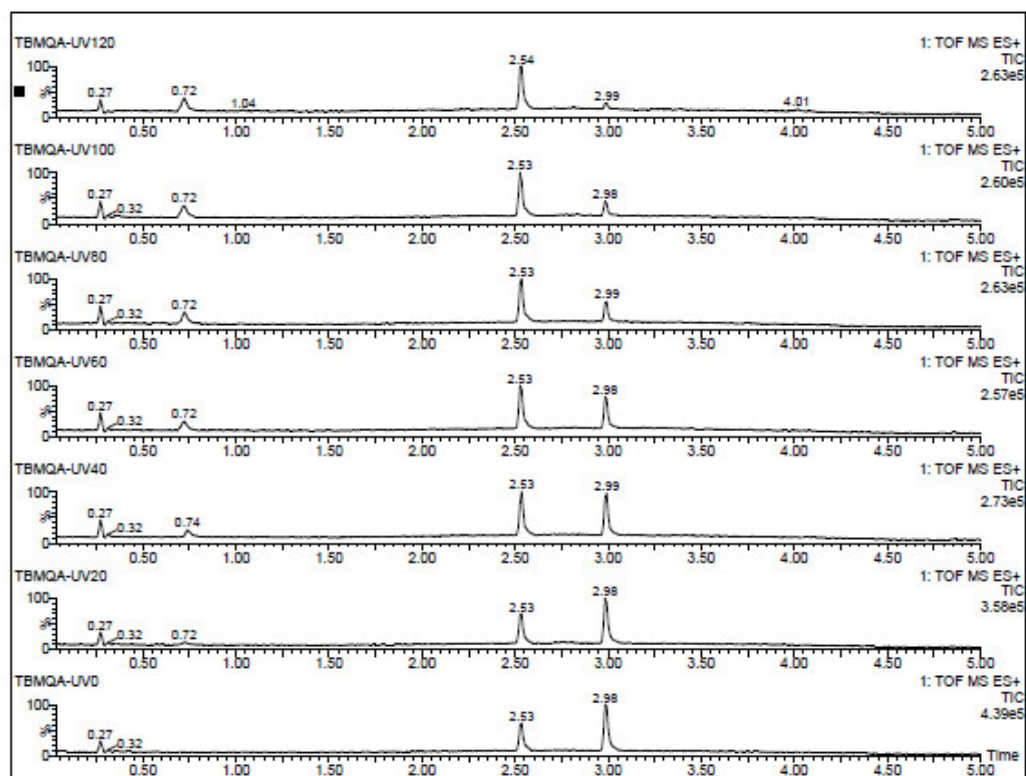

(b)

**Figure S1.** Chromatogram of terbuthylazine degradation over time in the LUZCHEM reactor (a) and in the semi-continuous reactor (b) after application of UV radiation in ultrapure water.
